# Supplementary material for: Acute kidney injury after liver resection: A systematic review, meta-analysis and metaregression of factors affecting it
Source: bioRxiv or medRxiv preprint supplement (doi:10.1101/2021.08.09.21261795), 2021-08-10
Supplement: Supplementary file [file media-3.pdf]

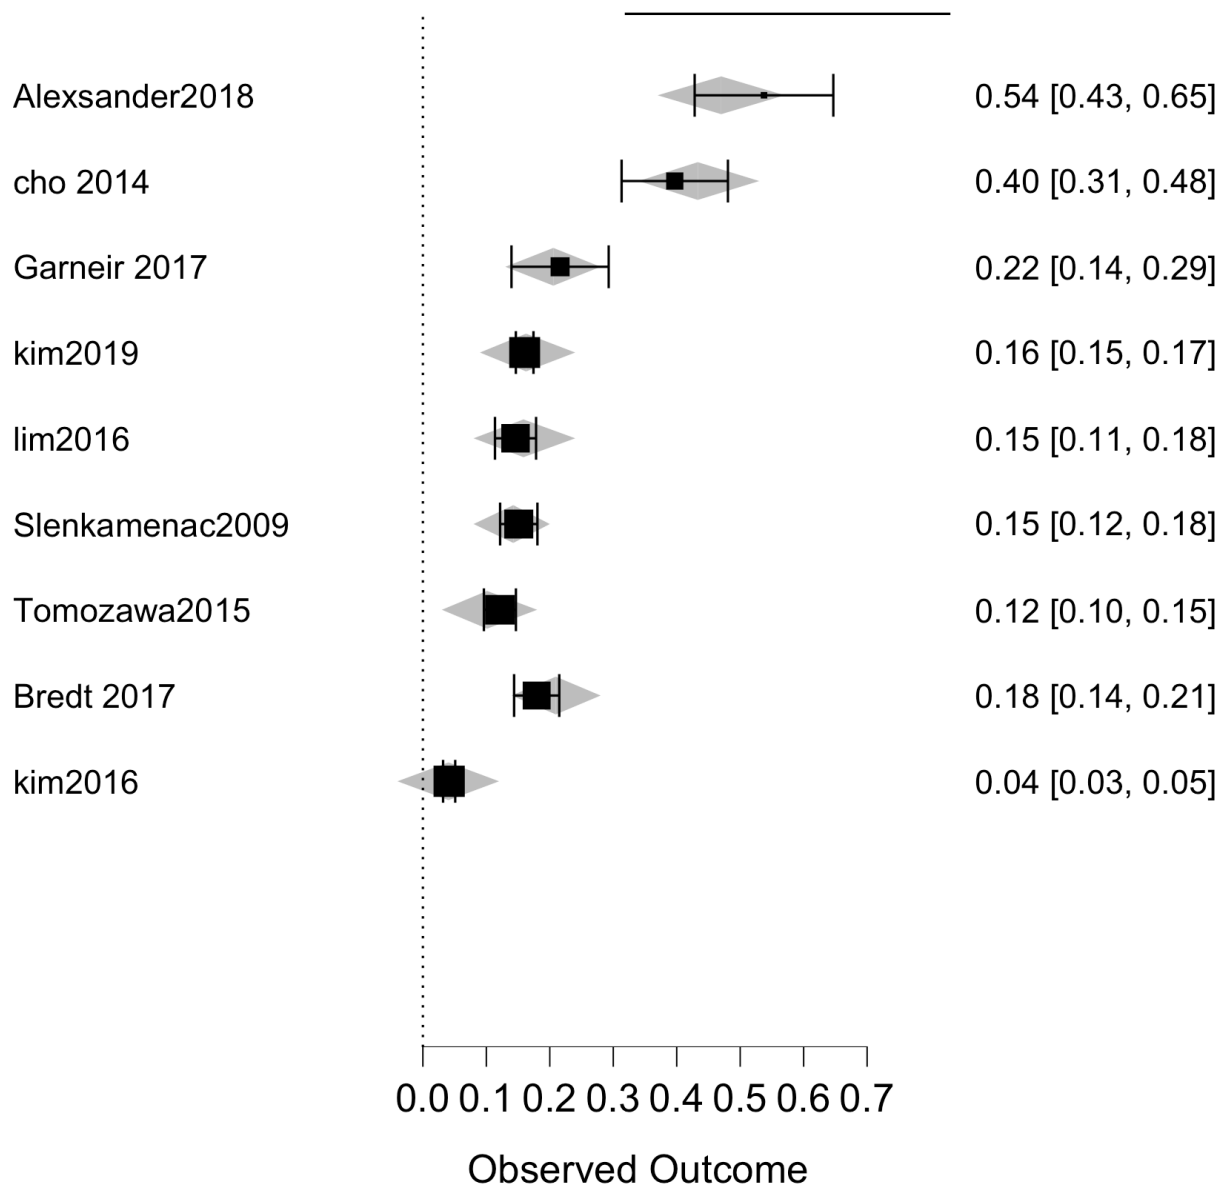

Supplement Figure 1 (a) Metaregression forest plot.

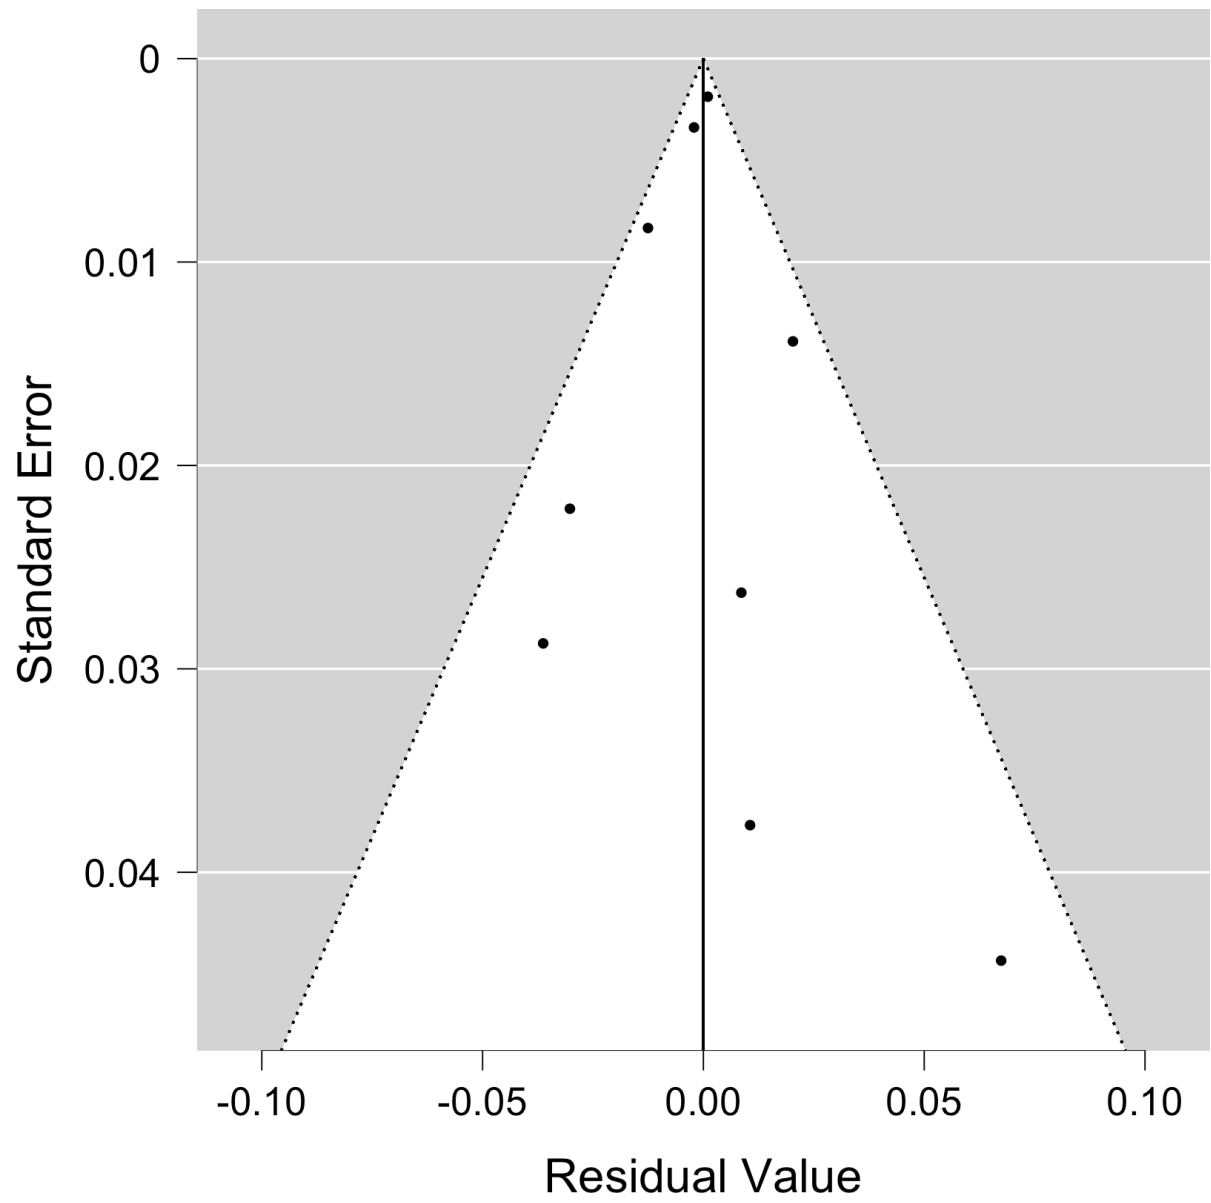

Supplement figure 1 (b) Metaregression funnel plots.
